# Supplementary material for: Rare-earth oxychalcogenide Eu2ZnGe2OS6: a phase-matching infrared nonlinear optical material with [GeOS3] units
Source: Royal Society of Chemistry journal article supplement (doi:10.1039/d4ce01051e), 2024-01-01
Supplement: d4ce01051e1.pdf [file d4ce01051e1.pdf]

*Supporting Information for*  
**Rare-Earth Oxychalcogenide  $\text{Eu}_2\text{ZnGe}_2\text{OS}_6$ : A Phase-Matching  
Infrared Nonlinear Optical Material with  $[\text{GeOS}_3]$  units**

Guili Wang,<sup>a,b</sup> Wentian Wu,<sup>a,b</sup> Chunxiao Li,<sup>a</sup> and Jiyong Yao<sup>a,b,\*</sup>

a Beijing Center for Crystal Research and Development, Key Lab of Functional Crystals and Laser Technology,

Technical Institute of Physics and Chemistry, Chinese Academy of Sciences, Beijing 100190, P. R. China.

b Center of Materials Science and Optoelectronics Engineering, University of Chinese Academy of Sciences, Beijing

100049, P. R. China.

\*Corresponding author:

Jiyong Yao; [jyao@mail.ipc.ac.cn](mailto:jyao@mail.ipc.ac.cn).

## Table of Contents

### Experimental Procedures

1. Reagents
2. Synthesis
3. Elemental analysis
4. Single crystal structure determination
5. Powder X-ray diffraction
6. Optical Characterizations
7. Powder SHG Test
8. Theoretical Calculation

**Table S1.** Crystallographic data and structure refinement for  $\text{Eu}_2\text{ZnGe}_2\text{OS}_6$ .

**Table S2.** Wyckoff site, fractional atomic coordinates ( $\times 10^4$ ), equivalent isotropic displacement parameters  $U_{eq}$  ( $\text{\AA}^2 \times 10^3$ ), and BVS for  $\text{Eu}_2\text{ZnGe}_2\text{OS}_6$ .

**Table S3.** Selected bond lengths ( $\text{\AA}$ ) and bond angles ( $^\circ$ ) for  $\text{Eu}_2\text{ZnGe}_2\text{OS}_6$ .

**Table S4.** The dipole moment direction and magnitude (in Debye) of  $[\text{ZnS}_4]^{6-}$  and  $[\text{GeOS}_3]^{4-}$  units in  $\text{Eu}_2\text{ZnGe}_2\text{OS}_6$ .

**Figure S1.** The element distribution images and atomic percentage (%) of  $\text{Eu}_2\text{ZnGe}_2\text{OS}_6$ .

**Figure S2.** The coordination geometry of  $\text{Eu}_2\text{ZnGe}_2\text{OS}_6$ .

**Figure S3.** The IR spectrum of  $\text{Eu}_2\text{ZnGe}_2\text{OS}_6$ .

**Figure S4.** The Raman spectrum of  $\text{Eu}_2\text{ZnGe}_2\text{OS}_6$  (inset:  $\text{Eu}_2\text{ZnGe}_2\text{OS}_6$  single crystals).

### References

## Experimental Procedures

**1. Reagents** All starting materials, Eu(99.95%),  $\text{Eu}_2\text{O}_3$  (99.9%),  $\text{ZnO}$ (99.9%),  $\text{ZnS}$  (99.9%), Ge (99.999%), S (99.999%), and CsI (99.9%) were directly purchased from Aladdin Co., Ltd. without further purification. The binary compounds EuS and  $\text{GeS}_2$  were synthesized by heating the stoichiometric ratios of raw elements in flame-sealed silica tubes at high temperatures. All manipulations were carried out in an argon-filled glovebox.

**2. Synthesis** For single crystal growth, The mixture of  $\text{Eu}_2\text{O}_3$ ,  $\text{ZnS}$ , and  $\text{GeS}_2$  (molar ratio:1:1:2, total mass 0.3 g) was homogeneously mixed and finely ground with the same mass of CsI and loaded into silica tubes, then these tubes were flame-sealed under a high vacuum of  $10^{-3}$  Pa and placed into a programmable furnace. These tubes were gradually heated to 1223 K from room temperature (RT) in 20 h and kept at 1223 K for 48 h, then slowly cooled to 623 K at a rate of 3 K/h, finally, the furnace was switched off and naturally cooled to RT. In the end, we obtained orange-colored block crystals of  $\text{Eu}_2\text{ZnGe}_2\text{OS}_6$ . For polycrystalline powder synthesis, the mixture of EuS,  $\text{ZnO}$ , and  $\text{GeS}_2$  at a stoichiometric molar ratio of 2:1:2 was ground and placed into a silica tube. This tube was heated to 1173 K at a rate of 1 K/h and kept for 72 h, then cooled to RT by switching off the furnace.

**3. Elemental analysis.** Elemental analysis of the single crystal was carried out using a field-emission Hitachi S-4800 scanning electron microscope (SEM) equipped with an OXFORD X-Max<sup>N</sup> 80 energy dispersive X-ray spectroscopy (EDS).

**4. Single crystal structure Determination.** A suitable single crystal of  $\text{Eu}_2\text{ZnGe}_2\text{OS}_6$  was selected under an optical microscope for structure determination. Its X-ray diffraction data were collected at 296.15 K employing a Bruker D8 Quest diffractometer ( $\text{Mo-K}_\alpha$  radiation,  $\lambda = 0.71073$  Å) equipped with a CCD area detector. The structure was solved with the SHELXT structure solution program using intrinsic phasing and refined with the SHELXL refinement package using least squares minimisation.<sup>1</sup>

**5. Powder X-ray Diffraction (PXRD).** The polycrystalline powder of  $\text{Eu}_2\text{ZnGe}_2\text{OS}_6$  was reground with an agate mortar for PXRD data collection using a Bruker D8 Advance diffractometer equipped with  $\text{Cu-K}_\alpha$  ( $\lambda = 1.5418$  Å) radiation. The collection range is from  $10^\circ$  to  $70^\circ$  with a scan speed of 0.1 s and a scan step width of  $0.02^\circ$ . The simulated pattern was

generated by Mercury software.<sup>2</sup>

**6. Optical Characterizations.** The IR spectrum of  $\text{Eu}_2\text{ZnGe}_2\text{OS}_6$  was measured using a Varian Excalibur 3100 spectrometer in the range of  $400\text{--}4000\text{ cm}^{-1}$ . To produce the test samples, dry KBr was completely mixed with  $\text{Eu}_2\text{ZnGe}_2\text{OS}_6$  at a mass ratio of about 100 : 1. The UV–vis–NIR diffuse reflectance spectrum was measured in the wavelength range of  $200\text{--}2500\text{ nm}$  by an Agilent Carry 7000 spectrophotometer equipped with an integrating sphere at RT, and a polytetrafluoroethylene sample as standard material. The absorption values were calculated from the reflectance data via the Kubelka-Munk function.<sup>3</sup> The Raman spectrum of  $\text{Eu}_2\text{ZnGe}_2\text{OS}_6$  was measured by a Lab RAM Aramis spectrometer equipped with a  $532\text{ nm}$  laser in the range of  $100\text{--}500\text{ cm}^{-1}$  at RT.

**7. Powder SHG Test.** Since  $\text{Eu}_2\text{ZnGe}_2\text{OS}_6$  belongs to the non-centrosymmetric (NCS) space group, its SHG intensity was evaluated through the Kurtz-Perry method employing a  $2090\text{ nm}$  fundamental laser. The  $\text{Eu}_2\text{ZnGe}_2\text{OS}_6$  polycrystalline powder was ground and filtered into samples with four particle sizes ( $20\text{--}50$ ,  $50\text{--}90$ ,  $90\text{--}125$ , and  $125\text{--}150\text{ }\mu\text{m}$ ). AGS crystals were also ground into the same range and served as the benchmark for the measurements.

**8. Theoretical Calculation.** Based on density functional theory (DFT), the CASTEP package was used to calculate the properties of  $\text{Eu}_2\text{ZnGe}_2\text{OS}_6$  at the atomic level.<sup>4</sup> The fine calculation quality was adopted. The CA-PZ function under the local density approximation (LDA) was selected as the exchange-correlation functional.<sup>5</sup> The interactions between valence electrons and ions were described using ultrasoft pseudopotentials (USP) by treating Eu  $4f^7 5s^2 5p^6 6s^2$ , Zn  $3d^{10} 4s^2$ , Ge  $4s^2 4p^2$ , O  $2s^2 2p^4$ , and S  $3s^2 3p^4$  electrons as valence electrons, respectively.<sup>6</sup> The L(S)DA+U method was used to treat the strongly correlated  $4f$  electrons. A dense Monkhorst-Pack k-point grid of  $2 \times 2 \times 2$  in the Brillouin zone was chosen for the  $\text{Eu}_2\text{ZnGe}_2\text{OS}_6$ . The plane-wave cutoff energy in the calculations was set to  $830\text{ eV}$ . The properties of the title compound were calculated after geometric optimization to bring the model to the convergence criterion.  $0.39\text{ eV}$  (the difference between the experimental and computed band gap) was set as the scissor operator in the computation of optical properties employing the scissors-corrected-LDA method.<sup>7</sup>

**Table S1.** Crystallographic data and structure refinement for Eu<sub>2</sub>ZnGe<sub>2</sub>OS<sub>6</sub>.

|                                           |                                                               |
|-------------------------------------------|---------------------------------------------------------------|
| CCDC number                               | 2390087                                                       |
| Empirical formula                         | Eu <sub>2</sub> ZnGe <sub>2</sub> OS <sub>6</sub>             |
| Formula Weight                            | 722.83                                                        |
| Crystal System                            | Tetragonal                                                    |
| Space Group                               | $P\bar{4}2_1m$ (113)                                          |
| $T/K$                                     | 296.15                                                        |
| $a$ (Å)                                   | 9.3838(7)                                                     |
| $b$ (Å)                                   | 9.3838(7)                                                     |
| $c$ (Å)                                   | 6.1509(7)                                                     |
| $\alpha$ (°)                              | 90                                                            |
| $\beta$ (°)                               | 90                                                            |
| $\gamma$ (°)                              | 90                                                            |
| $V(\text{Å}^3)$                           | 541.62(10)                                                    |
| $Z$                                       | 2                                                             |
| $\rho_{\text{calc}}$ (g/cm <sup>3</sup> ) | 4.432                                                         |
| $M$ (mm <sup>-1</sup> )                   | 20.178                                                        |
| $F(000)$                                  | 648.0                                                         |
| Crystal size/mm <sup>3</sup>              | $0.15 \times 0.12 \times 0.03$                                |
| Radiation                                 | Mo $K_{\alpha}$ ( $\lambda = 0.71073$ Å)                      |
| $2\theta$ range for data collection/°     | 6.14 to 66.56                                                 |
| Index ranges                              | $-14 \leq h \leq 14, -14 \leq k \leq 14, -9 \leq l \leq 9$    |
| Reflections collected                     | 13569                                                         |
| Independent reflections                   | 1127 [ $R_{\text{int}} = 0.0696, R_{\text{sigma}} = 0.0301$ ] |
| Data/restraints/parameters                | 1127/0/36                                                     |
| GoF on $F^2$                              | 1.104                                                         |
| Final $R$ indexes [ $I \geq 2\sigma(I)$ ] | $R_1 = 0.0219, wR_2 = 0.0501$                                 |
| Final $R$ indexes [all data]              | $R_1 = 0.0228, wR_2 = 0.0505$                                 |
| Largest diff.peak/hole/e Å <sup>-3</sup>  | 2.07/−1.11                                                    |
| Flack parameter                           | 0.12(3)                                                       |

$$^a R_1 = \Sigma ||F_o| - |F_c|| / \Sigma |F_o|, wR_2 = [\Sigma w(F_o^2 - F_c^2)^2 / \Sigma wF_o^4]^{1/2} \text{ for } F_o^2 > 2\sigma(F_o^2).$$

**Table S2.** Wyckoff site, fractional atomic coordinates ( $\times 10^4$ ), equivalent isotropic displacement parameters  $U_{eq}$  ( $\text{\AA}^2 \times 10^3$ ), and BVS for  $\text{Eu}_2\text{ZnGe}_2\text{OS}_6$ .

| Atom | Wyckoff site | x          | y          | z          | $U_{eq}^a$ | BVS <sup>b</sup> |
|------|--------------|------------|------------|------------|------------|------------------|
| Eu1  | 4e           | 8421.9(2)  | 6578.1(2)  | 10020.2(6) | 9.34(11)   | 2.101            |
| Ge1  | 4e           | 8729.0(5)  | 3729.0(5)  | 5792.8(11) | 5.61(16)   | 4.071            |
| Zn1  | 2b           | 5000       | 5000       | 5000       | 8.9(2)     | 2.122            |
| S1   | 8f           | 6758.9(13) | 4371.5(14) | 7482(2)    | 8.6(2)     | -2.156           |
| S2   | 4e           | 8651.5(14) | 3651.5(14) | 2311(3)    | 9.8(3)     | -1.968           |
| O1   | 2c           | 10000      | 5000       | 6976(12)   | 11.7(15)   | -1.907           |

<sup>a</sup> $U_{eq}$  is defined as one-third of the trace of the orthogonalized  $U_{ij}$  tensor.

<sup>b</sup>The bond valence sums (BVS) of  $\text{Eu}_2\text{ZnGe}_2\text{OS}_6$  were calculated by bond-valence parameters method through the following empirical expression<sup>1</sup>:

$$\sum_j v_{ij} = V_i$$

$$v_{ij} = \exp[(R_{ij} - d_{ij})/b]$$

Where  $v_{ij}$  is the valence of a bond between two atoms i and j,  $V_i$  is the sum of all the valences from a given

atom i,  $R_{ij}$  is the bond valence parameter,  $d_{ij}$  is actual length and  $b$  is commonly taken to be a universal

constant equal to 0.37  $\text{\AA}$ .

**Table S3.** Selected bond lengths (Å) and bond angles (°) for Eu<sub>2</sub>ZnGe<sub>2</sub>OS<sub>6</sub>.

| Atom–Atom              | Length(Å)  | Atom–Atom                              | Length(Å)  |
|------------------------|------------|----------------------------------------|------------|
| Eu–S1                  | 3.0265(14) | Ge1–S1                                 | 2.2048(13) |
| Eu–S1 <sup>#2</sup>    | 3.0429(13) | Ge1–S1 <sup>#8</sup>                   | 2.2048(13) |
| Eu–S1 <sup>#3</sup>    | 3.0429(13) | Ge1–S2                                 | 2.1442(18) |
| Eu–S1 <sup>#4</sup>    | 3.0265(14) | Ge1–O                                  | 1.837(3)   |
| Eu–S2 <sup>#5</sup>    | 3.0941(14) | Zn–S1                                  | 2.3245(13) |
| Eu–S2 <sup>#6</sup>    | 3.1027(18) | Zn–S1 <sup>#6</sup>                    | 2.3245(13) |
| Eu–S2 <sup>#7</sup>    | 3.0941(14) | Zn–S1 <sup>#9</sup>                    | 2.3245(13) |
| Eu–O                   | 2.809(5)   | Zn–S1 <sup>#10</sup>                   | 2.3245(13) |
| Atom–Atom–Atom         | Angle (°)  | Atom–Atom–Atom                         | Angle (°)  |
| S1–Ge–S1 <sup>#8</sup> | 103.67(7)  | S1 <sup>#9</sup> –Zn–S1 <sup>#5</sup>  | 97.88(6)   |
| S2–Ge–S1 <sup>#8</sup> | 116.85(5)  | S1 <sup>#5</sup> –Zn–S1                | 115.56(3)  |
| S2–Ge–S1               | 116.85(5)  | S1 <sup>#5</sup> –Zn–S1 <sup>#10</sup> | 115.56(3)  |
| O–Ge–S1                | 100.38(14) | S1 <sup>#10</sup> –Zn–S1               | 97.88(6)   |
| O–Ge–S1 <sup>#8</sup>  | 100.38(14) | S1 <sup>#9</sup> –Zn–S1                | 115.56(3)  |
| O–Ge–S2                | 116.1(2)   | S1 <sup>#9</sup> –Zn–S1 <sup>#10</sup> | 115.56(3)  |

Symmetry transformations used to generate equivalent atoms:

#1: 2-X, 1-Y, +Z;    #2: 1.5-X, 0.5+Y, 2-Z;    #3: 1.5-Y, 1.5-X, +Z;    #4: 1-Y, +X, 2-Z;  
 #5: 1-Y, +X, 1-Z;    #6: 2-X, 1-Y, 1+Z;    #7: +X, +Y, 1+Z;    #8: 0.5+Y, -0.5+X, +Z;  
 #9: +Y, 1-X, 1-Z;    #10: 1-X, 1-Y, +Z;    #11: +Y, 1-X, 2-Z;    #12: +X, +Y, -1+Z;  
 #13: 2-X, 1-Y, -1+Z;

**Table S4.** The dipole moment direction and magnitude (in Debye) of  $[\text{ZnS}_4]^{6-}$  and  $[\text{GeOS}_3]^{4-}$  units in  $\text{Eu}_2\text{ZnGe}_2\text{OS}_6$ .

| Compound                              | Unit                   | a       | b       | c      | Magnitude |
|---------------------------------------|------------------------|---------|---------|--------|-----------|
| $\text{Eu}_2\text{ZnGe}_2\text{OS}_6$ | $[\text{ZnS}_4]^{6-}$  | 0       | 0       | -0.002 | 0.002     |
|                                       | $[\text{GeOS}_3]^{4-}$ | -13.908 | -13.908 | -6.784 | 20.806    |

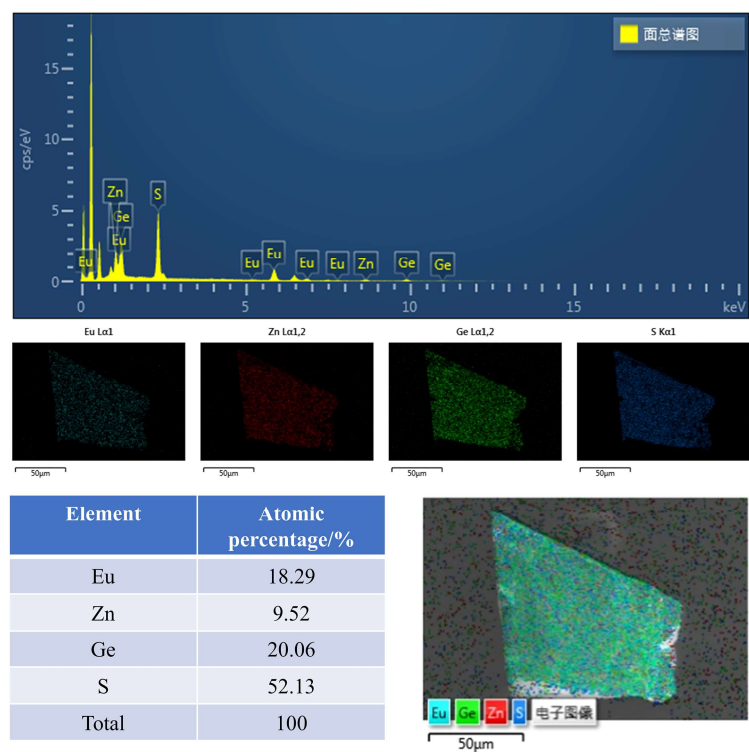

**Figure S1.** The element distribution images and atomic percentage (%) of  $\text{Eu}_2\text{ZnGe}_2\text{OS}_6$ .

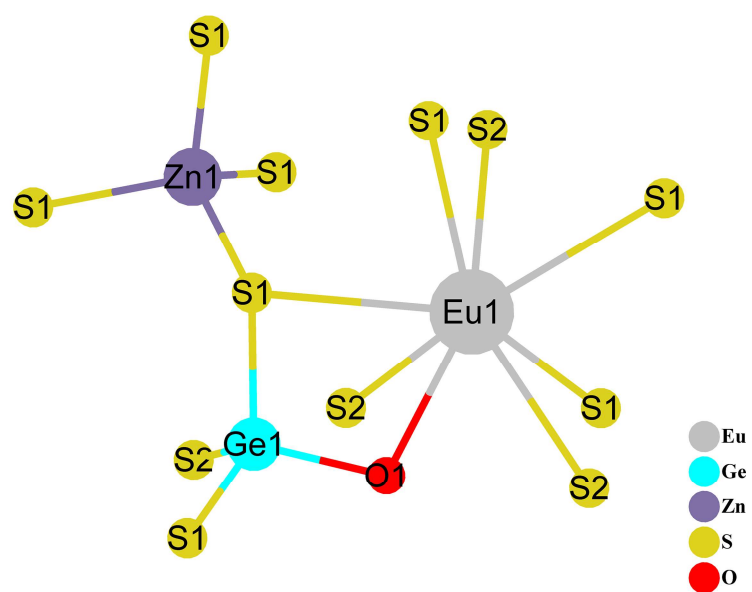

**Figure S2.** The coordination geometry of  $\text{Eu}_2\text{ZnGe}_2\text{OS}_6$ .

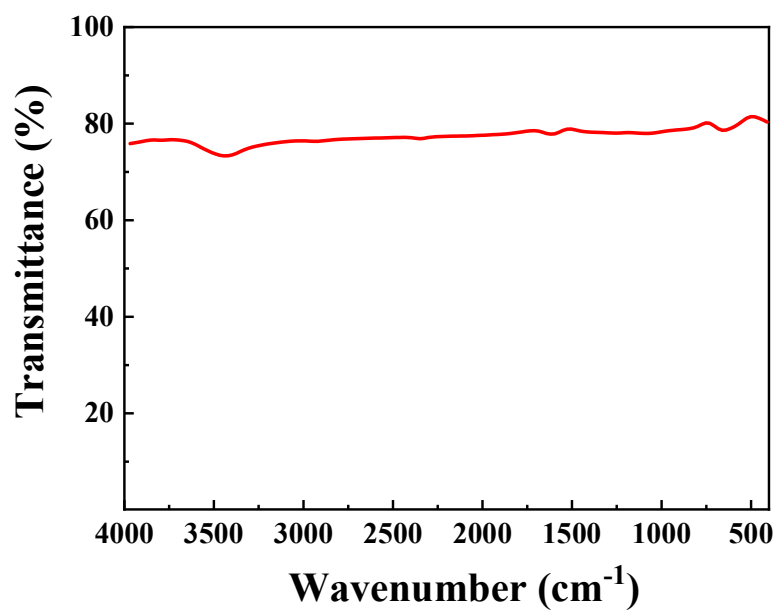

**Figure S3.** The IR spectrum of  $\text{Eu}_2\text{ZnGe}_2\text{OS}_6$ .

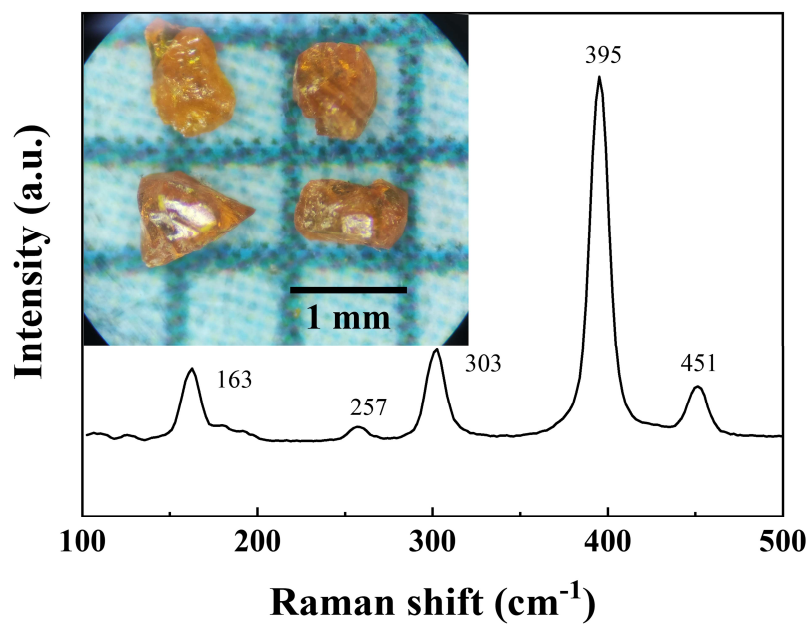

**Figure S4.** The Raman spectrum of  $\text{Eu}_2\text{ZnGe}_2\text{OS}_6$  (inset:  $\text{Eu}_2\text{ZnGe}_2\text{OS}_6$  single crystals).

## References

- (1) Sheldrick, G. Crystal structure refinement with SHELXL. *Acta Crystallogr., Sect. C: Struct. Chem.* **2015**, *71*, 3-8.
- (2) Macrae, C. F.; Sovago, I.; Cottrell, S. J.; Galek, P. T. A.; McCabe, P.; Pidcock, E.; Platings, M.; Shields, G. P.; Stevens, J. S.; Towler, M.; Wood, P. A. Mercury 4.0: from visualization to analysis, design and prediction. *J. Appl. Crystallogr.* **2020**, *53*, 226-235.
- (3) Simmons, E. L. Diffuse reflectance spectroscopy: a comparison of the theories. *Appl. Opt.* **1975**, *14*, 1380-1386.
- (4) Clark, S. J.; Segall, M. D.; Pickard, C. J.; Hasnip, P. J.; Probert, M. J.; Refson, K.; Payne, M. C. First principles methods using CASTEP. *Zeitschrift Fur Kristallographie* **2005**, *220*, 567-570.
- (5) Ceperley, D. M.; Alder, B. J. Ground State of the Electron Gas by a Stochastic Method. *Phys. Rev. Lett.* **1980**, *45*, 566-569.
- (6) Dal Corso, A.; Pasquarello, A.; Baldereschi, A. Density-functional perturbation theory for lattice dynamics with ultrasoft pseudopotentials. *Phys. Rev. B* **1997**, *56*, R11369-R11372.
- (7) Godby, R. W.; Schlüter, M.; Sham, L. J. Self-energy operators and exchange-correlation potentials in semiconductors. *Phys. Rev. B* **1988**, *37*, 10159-10175.
